# Supplementary material for: An Enhanced Self-Care Protocol for People Affected by Moderate to Severe Lymphedema
Source: MDPI journal article supplement (doi:10.3390/mps2030077), 2019-09-04
Supplement: s1 [file s1]

## Supplementary material

Figure S1. Standard-care brochure Bangladesh.

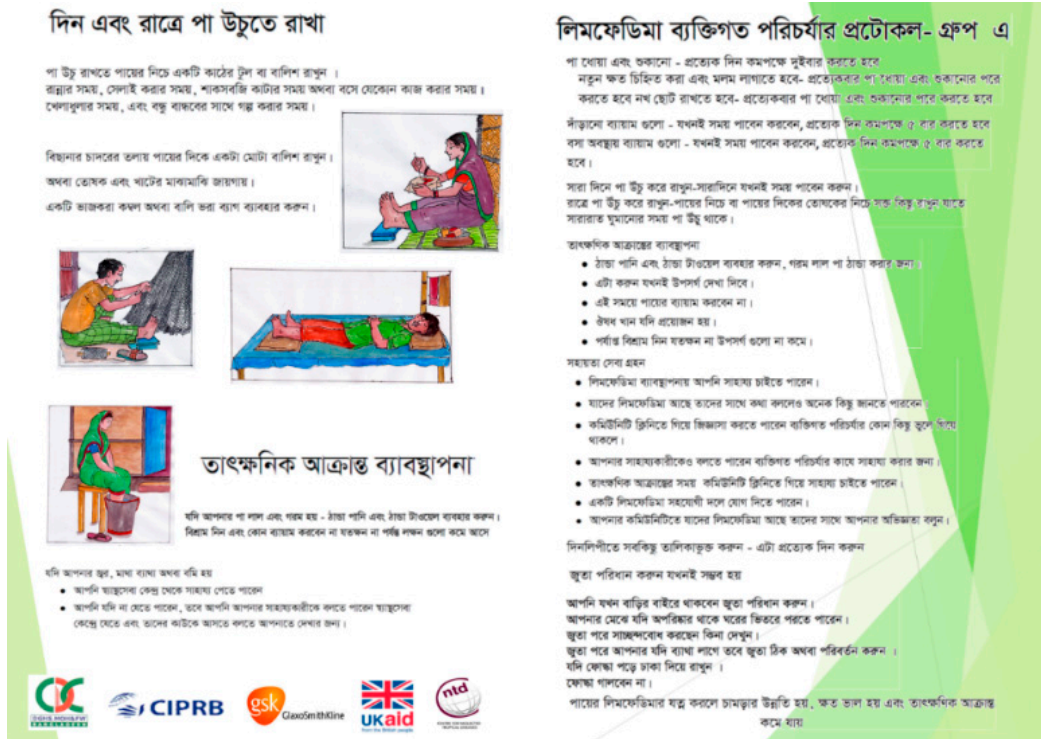

Front and back page view

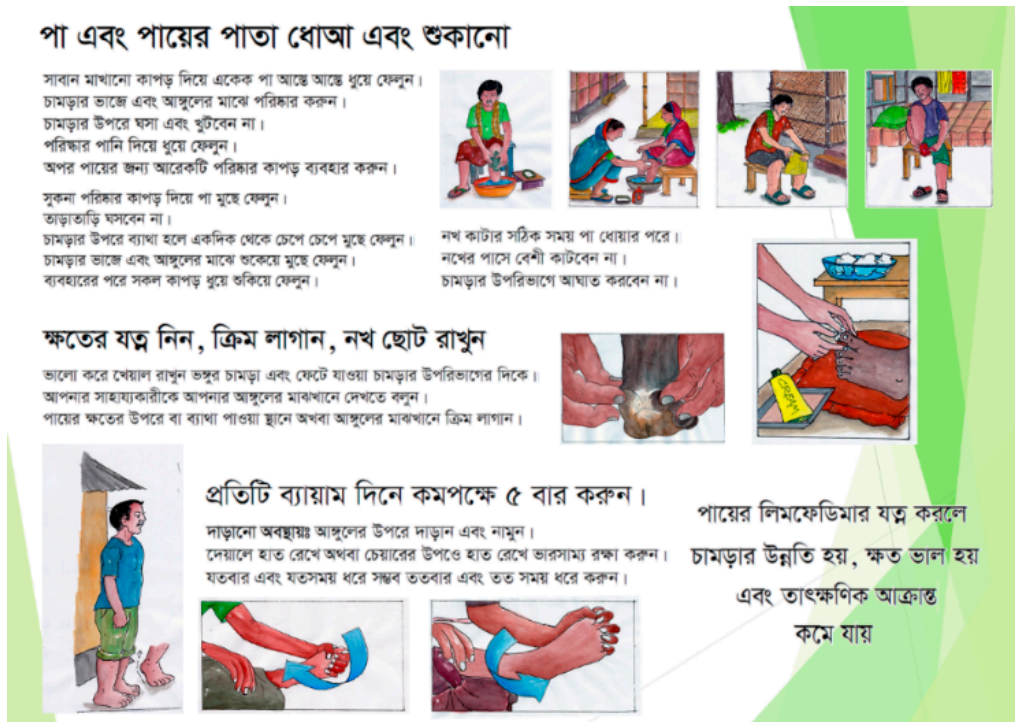

Inner page view

[illegible]

## አገር መብት እና የመራራቅ

የዘመናዊ አገር ስልጣን በጥንቃቄ መስጠት አለበት፡፡ የዘመናዊ አገር ስልጣን በጥንቃቄ መስጠት አለበት፡፡ የዘመናዊ አገር ስልጣን በጥንቃቄ መስጠት አለበት፡፡

በጣም አጭር እና ጥንቃቄ መስጠት አለበት፡፡ የዘመናዊ አገር ስልጣን በጥንቃቄ መስጠት አለበት፡፡ የዘመናዊ አገር ስልጣን በጥንቃቄ መስጠት አለበት፡፡

በጣም አጭር እና ጥንቃቄ መስጠት አለበት፡፡ የዘመናዊ አገር ስልጣን በጥንቃቄ መስጠት አለበት፡፡ የዘመናዊ አገር ስልጣን በጥንቃቄ መስጠት አለበት፡፡

## ቆዳን ማጥፋት ማዘዘር/መቀነስ/

የዘመናዊ አገር ስልጣን በጥንቃቄ መስጠት አለበት፡፡ የዘመናዊ አገር ስልጣን በጥንቃቄ መስጠት አለበት፡፡ የዘመናዊ አገር ስልጣን በጥንቃቄ መስጠት አለበት፡፡

በጣም አጭር እና ጥንቃቄ መስጠት አለበት፡፡ የዘመናዊ አገር ስልጣን በጥንቃቄ መስጠት አለበት፡፡ የዘመናዊ አገር ስልጣን በጥንቃቄ መስጠት አለበት፡፡

## የቆዳ ስንጥቆችን ያካውኑ/ከፈጥሩን ይጠቀሙ/ጥፋሮችን ይቀረጡ!!

የዘመናዊ አገር ስልጣን በጥንቃቄ መስጠት አለበት፡፡ የዘመናዊ አገር ስልጣን በጥንቃቄ መስጠት አለበት፡፡ የዘመናዊ አገር ስልጣን በጥንቃቄ መስጠት አለበት፡፡

## የአካል አንቀሳቃስ፤ እንደገና አንቀሳቃስ በጥንቃቄ 5ኛ ጊዜ ያድረግ

የዘመናዊ አገር ስልጣን በጥንቃቄ መስጠት አለበት፡፡ የዘመናዊ አገር ስልጣን በጥንቃቄ መስጠት አለበት፡፡ የዘመናዊ አገር ስልጣን በጥንቃቄ መስጠት አለበት፡፡

የዘመናዊ አገር ስልጣን በጥንቃቄ መስጠት አለበት፡፡ የዘመናዊ አገር ስልጣን በጥንቃቄ መስጠት አለበት፡፡ የዘመናዊ አገር ስልጣን በጥንቃቄ መስጠት አለበት፡፡

የዘመናዊ አገር ስልጣን በጥንቃቄ መስጠት አለበት፡፡ የዘመናዊ አገር ስልጣን በጥንቃቄ መስጠት አለበት፡፡ የዘመናዊ አገር ስልጣን በጥንቃቄ መስጠት አለበት፡፡

የዘመናዊ አገር ስልጣን በጥንቃቄ መስጠት አለበት፡፡ የዘመናዊ አገር ስልጣን በጥንቃቄ መስጠት አለበት፡፡ የዘመናዊ አገር ስልጣን በጥንቃቄ መስጠት አለበት፡፡

የዘመናዊ አገር ስልጣን በጥንቃቄ መስጠት አለበት፡፡ የዘመናዊ አገር ስልጣን በጥንቃቄ መስጠት አለበት፡፡ የዘመናዊ አገር ስልጣን በጥንቃቄ መስጠት አለበት፡፡
